# Supplementary material for: Dimensional Control in Polyoxometalate Crystals Hybridized with Amphiphilic Polymerizable Ionic Liquids
Source: MDPI journal article supplement (doi:10.3390/ma12142283), 2019-07-16
Supplement: s1 [file s1]

Supporting Information

# Dimensional Control in Polyoxometalate Crystals Hybridized with Amphiphilic Polymerizable Ionic Liquids

Toshiyuki Misawa <sup>1</sup>, Jun Kobayashi <sup>1</sup>, Yoshiki Kiyota <sup>1</sup>, Masayuki Watanabe <sup>2</sup>, Seiji Ono <sup>2</sup>, Yosuke Okamura <sup>2</sup>, Shinichi Koguchi <sup>1</sup>, Masashi Higuchi <sup>2</sup>, Yu Nagase <sup>2</sup> and Takeru Ito <sup>1,\*</sup>

<sup>1</sup> Department of Chemistry, School of Science, Tokai University, 4-1-1 Kitakaname, Hiratsuka 259-1292, Japan

<sup>2</sup> Department of Applied Chemistry, School of Engineering, Tokai University, 4-1-1 Kitakaname, Hiratsuka 259-1292, Japan

\* Correspondence: takeito@keyaki.cc.u-tokai.ac.jp; Tel.: +81-463-58-1211 ex. 3737 (T.I.)

Received: 19 June 2019; Accepted: 15 July 2019; Published: date

## 1. Syntheses of polymerizable ionic-liquids

### 1.2. Synthesis of 2-(1H-Imidazol-1-yl) Ethyl Methacrylate (MAIm)

#### 1.2.1. Synthesis of 1-(2-Chloroethyl)-1H-Imidazole

The solution of imidazole 2.04 g (30 mmol) in 1,2-dichloroethane (30 mL) was added to tetrabutylammonium bromide 0.20 g (0.6 mmol) and K<sub>2</sub>CO<sub>3</sub> 0.82 g (6 mmol). The result mixture was stirred at 358 K for 5 h. The mixture was extracted with CHCl<sub>3</sub>, and the organic layer was washed with water, dried (MgSO<sub>4</sub>) and evaporated. The product was isolated by silica gel column chromatography to give the title compound (1.47 g, 37%) as a colorless liquid.

<sup>1</sup>H NMR:  $\delta$  (500 MHz, CDCl<sub>3</sub>, ppm): 3.76 (2H, t,  $J$  = 10 Hz), 4.28 (2H, t,  $J$  = 10 Hz), 6.98 (1H, s), 7.10 (1H, s), 7.54 (1H, s).

#### 1.2.2. Synthesis of 2-(1H-Imidazol-1-yl) Ethyl Methacrylate (MAIm)

The solution of 1-(2-chloroethyl)-1H-imidazole 1.13 g (13.2 mmol) in THF (25 mL) was added to methacrylic acid 1.47 g (11.2 mmol) and K<sub>2</sub>CO<sub>3</sub> 3.58 g (25.9 mmol). The resulting mixture was stirred at 339 K overnight. The mixture was extracted with CHCl<sub>3</sub>, and the organic layer was washed with water, dried (MgSO<sub>4</sub>), and evaporated. The product was isolated by silica gel column chromatography to give 1.70 g (84%) of the title compound as a colorless liquid.

<sup>1</sup>H NMR:  $\delta$  (500 MHz, CDCl<sub>3</sub>, ppm): 1.93 (3H, s), 4.25 (2H, t,  $J$  = 5 Hz), 4.40 (2H, t,  $J$  = 5 Hz), 5.61 (1H, s), 6.10 (1H, s), 6.96 (1H, s), 7.08 (1H, s), 7.51 (1H, s).

### 1.2. Synthesis of 1-(2-(methacryloyloxy) ethyl)-3-octyl-1H-imidazol-3-ium Bromide (MAImCs-Br)

The solution of 2-(1H-imidazol-1-yl) ethyl methacrylate (MAIm, 0.61 g (3.4 mmol)) in 1-bromooctane 1.15 g (6 mmol) was stirred at 333 K overnight. The product was isolated by silica gel column chromatography to give 1.00 g (80%) of the title compound as a yellow liquid.

<sup>1</sup>H NMR:  $\delta$  (500 MHz, DMSO-d<sub>6</sub>, ppm): 0.86 (3H, t,  $J$  = 6.91 Hz), 1.25 (10H, m), 1.77 (2H, m), 1.85 (3H, t,  $J$  = 1.14 Hz), 4.19 (2H, t,  $J$  = 6.93 Hz), 4.48 (2H, m), 4.54 (2H, t,  $J$  = 4.41 Hz), 5.72 (1H, quint.,  $J$  = 1.61 Hz), 6.03 (1H, t,  $J$  = 1.13 Hz), 7.85 (2H, m), 9.29 (1H, s, 1H).

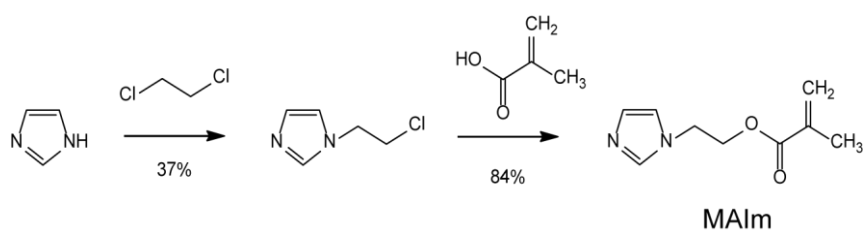

**Figure S1.** Synthetic route of MAIm.

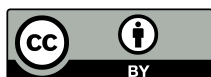

© 2019 by the authors. Submitted for possible open access publication under the terms and conditions of the Creative Commons Attribution (CC BY) license (<http://creativecommons.org/licenses/by/4.0/>).
